# Supplementary material for: Antioxidant Defense Capacity Is Reduced in Thyroid Stem/Precursor Cells Compared to Differentiated Thyrocytes
Source: MDPI journal article supplement (doi:10.3390/ijms241411509), 2023-07-15

**Figure S1.** Increased expression of the antioxidant genes *NQO1*, *SLC7A11*, *TXNRD1* and *EPHX1* in stem/precursor thyroid cell spheroids treated with 5  $\mu$ M curcumin for 18h. mRNA levels were measured by qPCR. Bar graph show the relative mRNA level of genes in the curcumin-treated spheroid compared to control spheroid used as calibrator. Data shown are the mean  $\pm$  S.E.M. of three independent experiments. (\* $p < 0.05$ , \*\* $p < 0.01$ , \*\*\* $p < 0.001$ ).

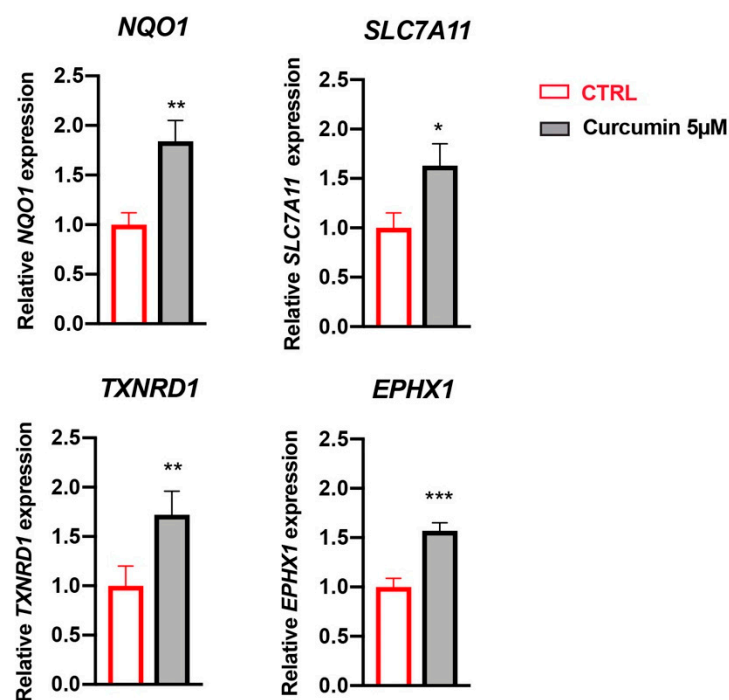

Supplement: s1 [file s1]
